# Supplementary material for: Synthesis of manganese dioxide/iron oxide/graphene oxide magnetic nanocomposites for hexavalent chromium removal
Source: Royal Society of Chemistry journal article supplement (doi:10.1039/c5ra06455d), 2015-01-01
Supplement: c5ra06455d1.pdf [file c5ra06455d1.pdf]

## Supplementary Material

### **Synthesis of manganese dioxide/iron oxide/graphene oxide magnetic nanocomposites for hexavalent chromium removal**

Yan Liu<sup>a</sup>, Chao Luo<sup>a,b</sup>, Guijia Cui<sup>a</sup>, Shiqiang Yan<sup>\*, a</sup>

<sup>a</sup> *College of Chemistry and Chemical Engineering, Lanzhou University, Lanzhou 730000, P R  
China*

<sup>b</sup> *CNOOC Tianjin Chemical Research & Design Institute, Tianjin 30000, P R China*

---

\* Corresponding author. Tel.: +86 931 8912582; Fax: +86 931 8912582  
E-mail address: yansq@lzu.edu.cn

## 1. Characterization of different materials

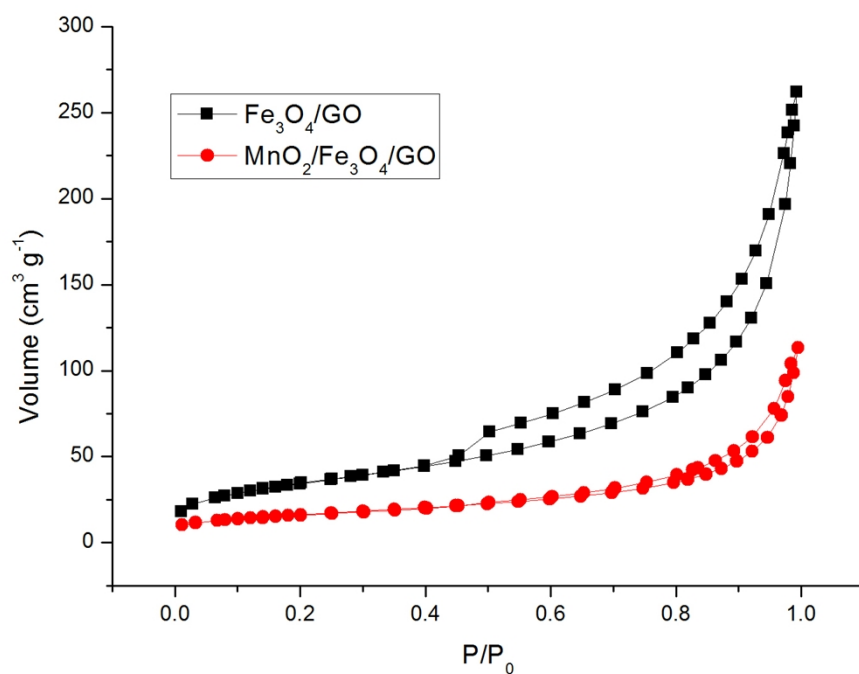

**Fig. S1** N<sub>2</sub> adsorption-desorption isotherm of Fe<sub>3</sub>O<sub>4</sub>/GO and MnO<sub>2</sub>/Fe<sub>3</sub>O<sub>4</sub>/GO.

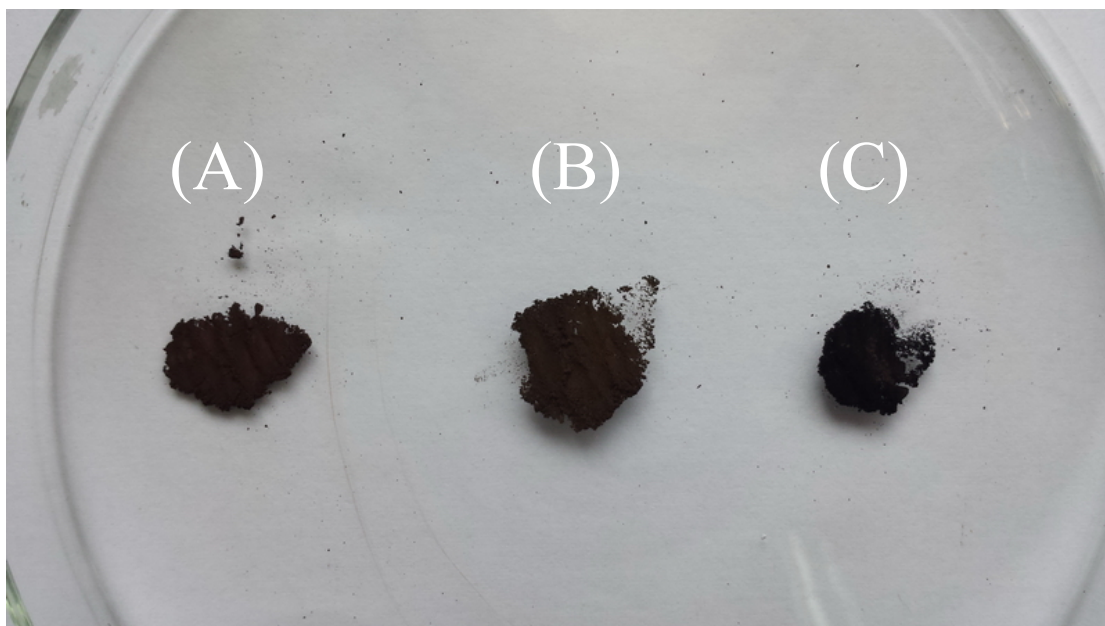

**Fig. S2** The color of  $\text{MnO}_2/\text{Fe}_3\text{O}_4/\text{RGO}$  (pH = 7) (B),  $\text{MnO}_2/\text{Fe}_3\text{O}_4/\text{RGO}$  (pH = 5) (A) and  $\text{MnO}_2/\text{Fe}_3\text{O}_4/\text{RGO}$  (pH = 1) (C).

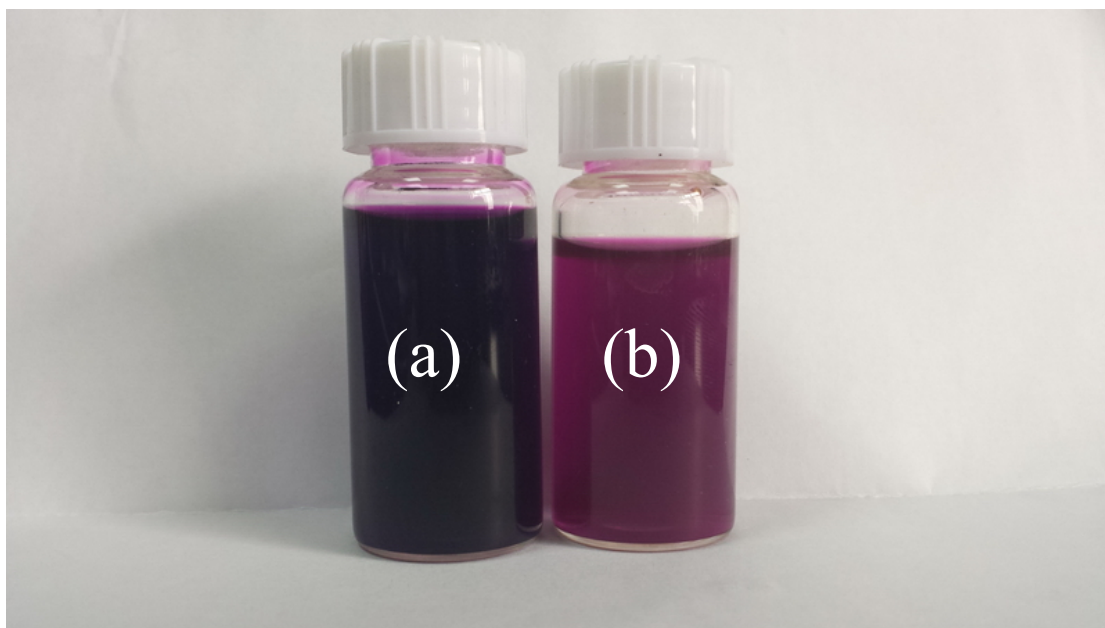

**Fig. S3** The color of solution after reaction: initial synthesis solution pH = 7.0 (a) and pH = 1.0 (b).

## 2. Adsorption Isotherms

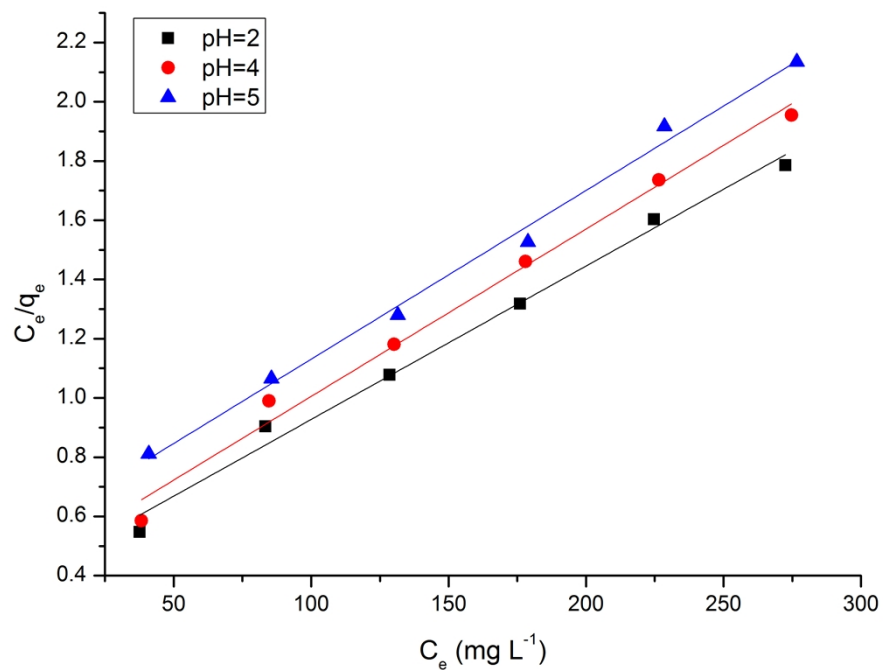

**Fig. S4** Langmuir adsorption isotherm plots for chromium adsorption onto MnO<sub>2</sub>/Fe<sub>3</sub>O<sub>4</sub>/GO at different pH values.

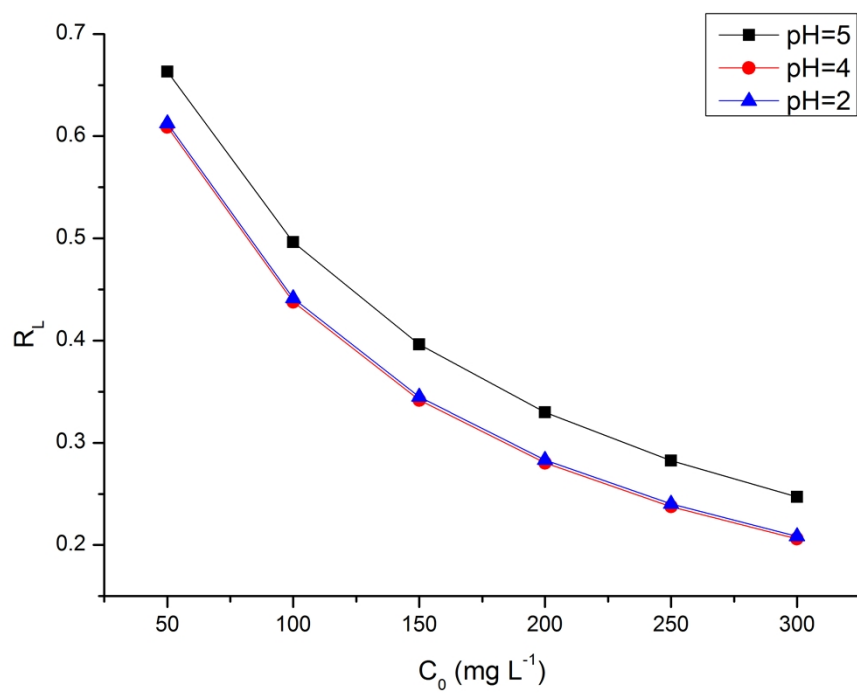

**Fig. S5** Equilibrium parameter of chromium ions adsorbed onto MnO<sub>2</sub>/Fe<sub>3</sub>O<sub>4</sub>/GO at different pH values

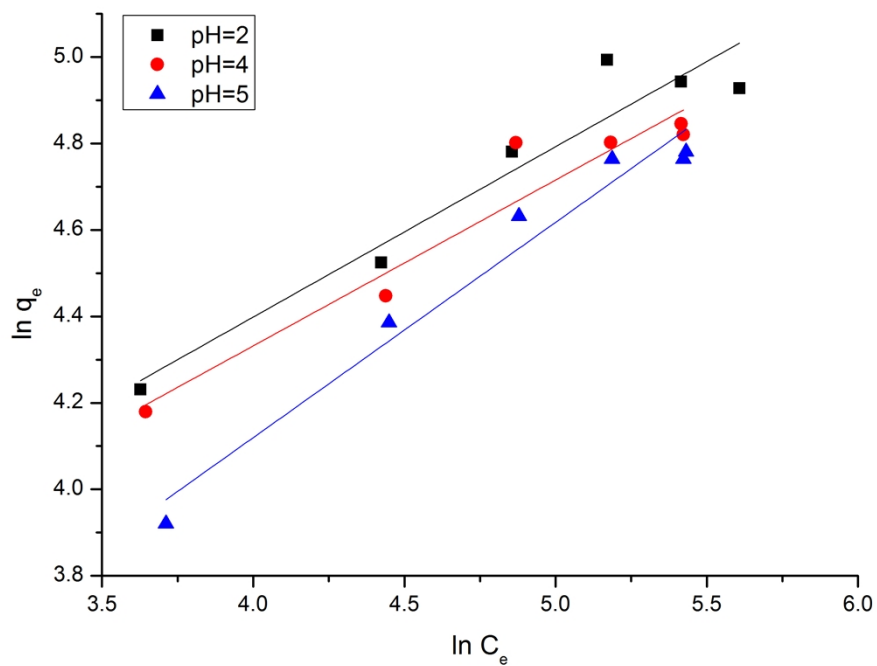

**Fig. S6** Freundlich adsorption isotherm plots for chromium adsorption onto  $\text{MnO}_2/\text{Fe}_3\text{O}_4/\text{GO}$  at different pH values.

### 3. Adsorption Kinetics

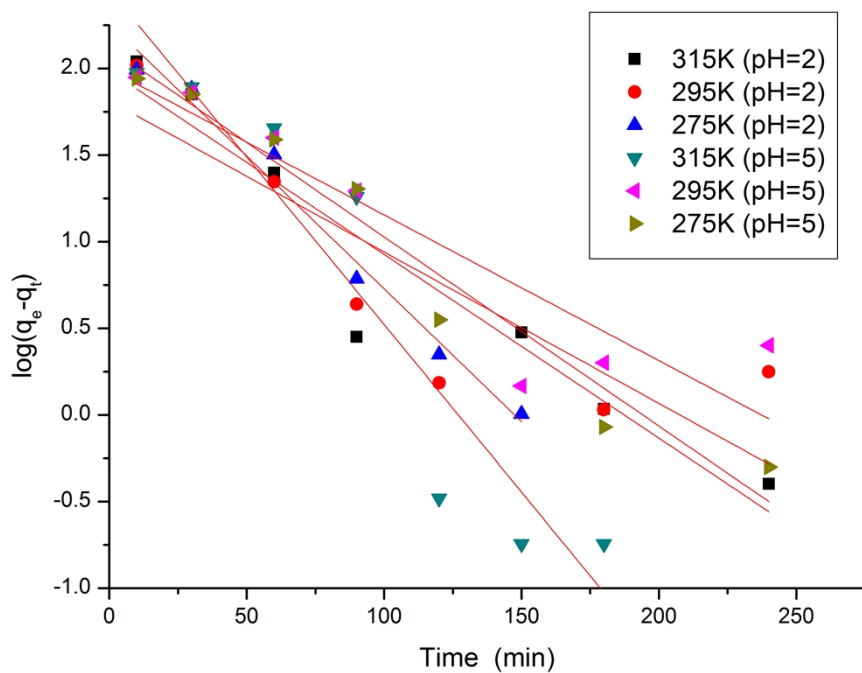

**Fig. S7** Plot of the pseudo-first-order kinetic model for chromium on  $\text{MnO}_2/\text{Fe}_3\text{O}_4/\text{GO}$  at different temperatures and pH values.



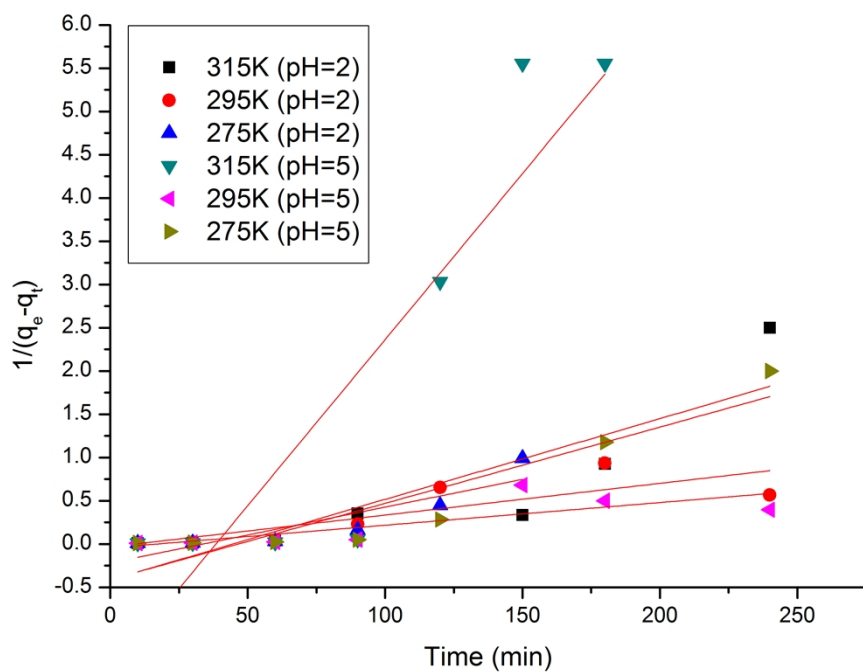

**Fig. S8** Plot of the second-order kinetic model for chromium on MnO<sub>2</sub>/Fe<sub>3</sub>O<sub>4</sub>/GO at different temperatures and pH values.

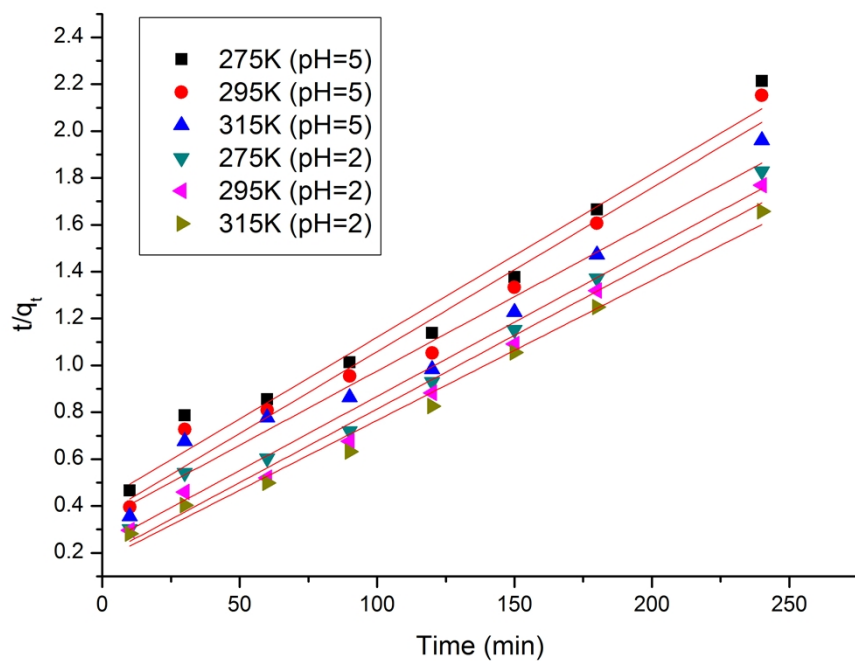

**Fig. S9** Plot of the pseudo-second-order kinetic model for chromium on  $\text{MnO}_2/\text{Fe}_3\text{O}_4/\text{GO}$  at different temperatures and pH values.
